# Supplementary material
Source: MDPI journal article supplement (https://www.mdpi.com/2221-3759/10/1/9)
Supplement: s1 [file s1]

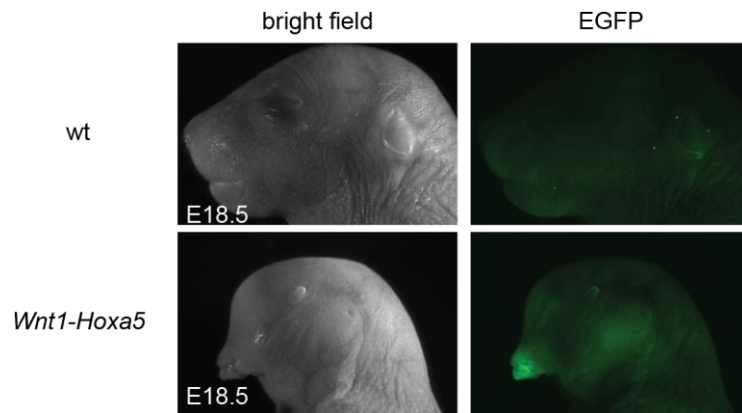

**Figure S1.** EGFP signal in E18.5 *Wnt1-Hoxa5* mouse fetus. E18.5 wild-type (wt, top) and *Wnt1-Hoxa5* (bottom) fetuses in bright field (left) and EGFP (right) signals; note that above-background EGFP signal is visible underneath the skin in underlying facial structures of *Wnt1-Hoxa5* specimen.
